# Supplementary material
Source: publisher figshare collection journal article supplement (https://gsajournals.figshare.com/ndownloader/files/25468376)
Supplement: Supplementary file 1 [file 25468376]

**Table S2. Protein sequences of MAPKs used for phylogenetic analysis**

| **Species** | **MAPK name** | **Gene model number (KEGG)** |
| --- | --- | --- |
| *Saccharomyces cerevisiae* | Sce-Kss1 | YGR040W |
| Sce-Fus3 | YBL016W |
| Sce-Slt2 | YHR030C |
| Sce-Hog1 | YLR113W |
| Sce-Ime2 | YJL106W |
| *Neurospora crassa* | Ncr-Mak2 | NCU02393 |
| Ncr-Mak1 | NCU09842 |
| Ncr-Os2 | NCU07024 |
| Ncr-Ime2 | NCU01498 |
| *Fusarium oxysporum* | Fox-Fmk1 | FOXG_08140 |
| Fox-Mpk1 | FOXG_05092 |
| Fox-Hog1 | FOXG_06318 |
| Fox-Ime2 | FOXG_13813 |
| *Magnaporthe oryzae* | Mor-Pmk1 | MGG_09565 |
| Mor-Mps1 | MGG_04943 |
| Mor-Osm1 | MGG_01822 |
| Mor-Ime2 | MGG_15325 |
| *Cryptococcus neoformans* | Cne-Cpk1 | CNBE0440 |
| Cne-Mpk1 | CNBH0400 |
| Cne-Hog1 | CNBC0610 |
| Cne-Ime2 | CGB_M3020W |
| *Arthrobotrys oligospora* | Ao-Fus3 | EYR41_011934 (Yang et al. 2020) |
| Ao-Slt2 | EYR41_004559 |
| Ao-Hog1 | EYR41_010451 |
| Ao-Ime2 | EYR41_009089 |
